# Supplementary material for: Normal GCAPs partly compensate for altered cGMP signaling in retinal dystrophies associated with mutations in GUCA1A
Source: PubMed Central journal article supplement (PMC6934868; doi:10.1038/s41598-019-56606-5), 2019-12-27
Supplement: 41598_2019_56606_MOESM1_ESM.pdf [file 41598_2019_56606_MOESM1_ESM.pdf]

## Supporting information

# Normal GCAPs partly compensate for altered cGMP signaling in retinal dystrophies associated with mutations in *GUCA1A*

Daniele Dell'Orco<sup>1\*</sup> and Giuditta Dal Cortivo<sup>1</sup>

<sup>1</sup>Department of Neuroscience, Biomedicine and Movement Sciences, Section of Biological Chemistry, University of Verona, I-37134 Verona, Italy

\*to whom correspondence should be addressed. Telephone: +39-045-8027637; E-mail: [daniele.dellorco@univr.it](mailto:daniele.dellorco@univr.it)

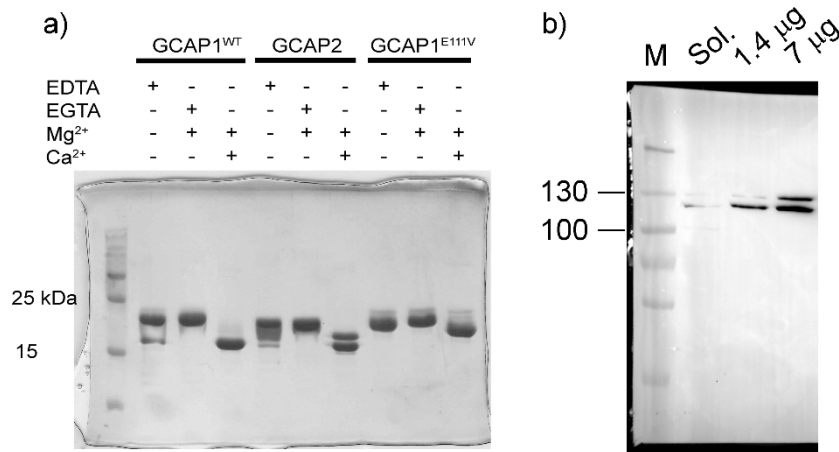

**Figure S1. Purity of recombinant proteins and GC1 enzymatic assay.** a) Full-length gel used for the preparation of Figure 1a. b) Western blot analysis of HEK293 soluble phase (Sol) and two different amounts (1.4 and 7 µg) of membrane proteins previously quantified by amido black. Anti-GC1#3 antibody (Ref. 51) was used (1:1000 dilution).

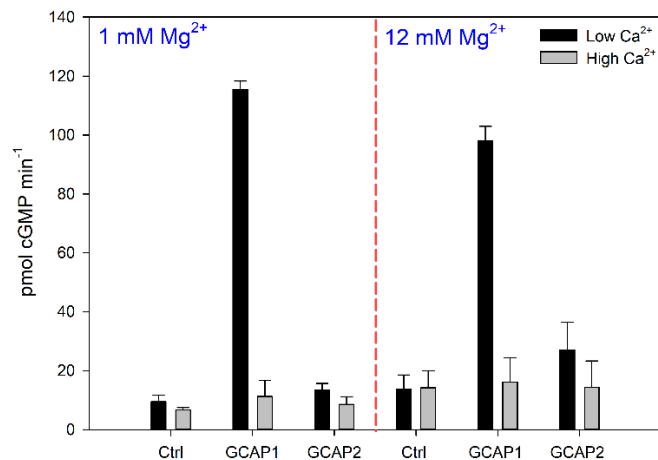

**Figure S2: GC assay at different Mg<sup>2+</sup> concentrations.** Guanylate Cyclase activity induced by GCAPs was analyzed at 1 mM (left) and 12 mM Mg<sup>2+</sup> (right), in the presence of low (< 19 nM) and high (~30 µM) Ca<sup>2+</sup> concentration. Each measurement represents the average of three replicas.
